# Supplementary material for: Buffering and proteolysis are induced by segmental monosomy in Drosophila melanogaster
Source: PubMed Central journal article supplement — Nucleic Acids Res. 2012 Mar 19;40(13):5926–37. doi: 10.1093/nar/gks245 (PMC3401434; doi:10.1093/nar/gks245), 2012-03-19
Supplement: supp_gks245_nar-03119-v-2011-File009.pdf [file supp_gks245_nar-03119-v-2011-File009.pdf]

## Supplementary Data for

Buffering and proteolysis are induced by segmental monosomy in

*Drosophila melanogaster*

Lina E. Lundberg<sup>1</sup>, Margarida L. A. Figueiredo<sup>1</sup>, Per Stenberg<sup>1,2</sup> & Jan Larsson<sup>1</sup>

<sup>1</sup>Department of Molecular Biology, Umeå University, SE-90187 Umeå, Sweden

<sup>2</sup>Computational Life Science Cluster (CLiC), Umeå University, Sweden.

### **This PDF includes:**

Supplementary Figure S1, Supplementary Tables S1-S4

## LEGENDS SUPPLEMENTARY DATA

**Supplementary Table S1.** List of fly crosses.

**Supplementary Table S2.** Spearman correlation matrix of buffering effects versus gene features. Spearman Rank correlation was used to determine the correlation between median buffering effect (median expression ratio of all replicates in  $\log_2$  scale) of each gene uncovered by a *Df* and 16 different gene criteria. Correlation coefficients marked in red are significant at  $p < 0.05$ . (For definitions of criteria, see Materials and Methods).

**Supplementary Figure S1.** Expression ratios are approximately normally distributed. The distribution of expression ratios for genes present in haploid versus diploid condition with a normal distribution curve superimposed.

**Supplementary Table S3.** List of top 100 diploid genes up-regulated as a response to segmental aneuploidy. Genes marked with an “x” belong to one of the four significantly enriched GO-terms (as detected using the Functional Annotation Chart in NIH DAVID, GOterm levels 5).

**Supplementary Table S4.** List of qPCR primer sequences used in this study.

## Supplementary Table S1

### List of crosses

| Females                            | Males                              | Comment                                   |
|------------------------------------|------------------------------------|-------------------------------------------|
| $w^{1118}_{iso}; 2_{iso}; 3_{iso}$ | $w^{1118}_{iso}; 2_{iso}; 3_{iso}$ | Crosses for six wild type replicates      |
| $w^{1118}_{iso}; 2_{iso}; 3_{iso}$ | <i>Df(3R)ED10953/TM6c</i>          |                                           |
| $w^{1118}_{iso}; 2_{iso}; 3_{iso}$ | <i>Df(2L)ED4559/SM6a</i>           |                                           |
| $w^{1118}_{iso}; 2_{iso}; 3_{iso}$ | <i>Df(2L)ED748/SM6a</i>            | No <i>Df</i> , see Material and Methods * |
| $w^{1118}_{iso}; 2_{iso}; 3_{iso}$ | <i>Df(2R)ED1770/SM6a</i>           |                                           |
| $w^{1118}_{iso}; 2_{iso}; 3_{iso}$ | <i>Df(2R)ED1612/SM6a</i>           |                                           |
| $w^{1118}_{iso}; 2_{iso}; 3_{iso}$ | <i>Df(2L)ED3/SM6a</i>              |                                           |
| $w^{1118}_{iso}; 2_{iso}; 3_{iso}$ | <i>Df(3R)ED5071/TM6C</i>           |                                           |
| $w^{1118}_{iso}; 2_{iso}; 3_{iso}$ | <i>Df(3R)ED7665/TM6C</i>           |                                           |
| $w^{1118}_{iso}; 2_{iso}; 3_{iso}$ | <i>Df(3R)ED10946/TM6C</i>          | No <i>Df</i> , see Material and Methods * |
| <i>Df(3R)ED5071/TM6C</i>           | <i>Df(2L)ED4559/SM6a</i>           |                                           |
| <i>Df(3R)ED5071/TM6C</i>           | <i>Df(3R)ED10953/TM6c</i>          |                                           |
| <i>Df(3R)ED5071/TM6C</i>           | <i>Df(2R)ED1770/SM6a</i>           |                                           |
| <i>Df(3R)ED5071/TM6C</i>           | <i>Df(2R)ED1612/SM6a</i>           |                                           |
| <i>Df(3R)ED5071/TM6C</i>           | <i>Df(2L)ED3/SM6a</i>              |                                           |
| <i>Df(3R)ED5071/TM6C</i>           | <i>Df(3R)ED7665/TM6C</i>           | Lethal combination                        |
| <i>Df(3R)ED5071/TM6C</i>           | <i>Df(3R)ED10946/TM6C</i>          | Treated as <i>Df(3R)ED5071/+</i>          |
| <i>Df(3R)ED7665/TM6C</i>           | <i>Df(2L)ED4559/SM6a</i>           |                                           |
| <i>Df(3R)ED7665/TM6C</i>           | <i>Df(3R)ED10953/TM6c</i>          |                                           |
| <i>Df(3R)ED7665/TM6C</i>           | <i>Df(2R)ED1770/SM6a</i>           |                                           |
| <i>Df(3R)ED7665/TM6C</i>           | <i>Df(2R)ED1612/SM6a</i>           |                                           |
| <i>Df(3R)ED7665/TM6C</i>           | <i>Df(2L)ED3/SM6a</i>              |                                           |
| <i>Df(3R)ED7665/TM6C</i>           | <i>Df(3R)ED10946/TM6C</i>          | Treated as <i>Df(3R)ED7665/+</i>          |
| <i>Df(3R)ED10946/TM6C</i>          | <i>Df(2L)ED4559/SM6a</i>           | Treated as <i>Df(2L)ED4559/+</i>          |
| <i>Df(3R)ED10946/TM6C</i>          | <i>Df(3R)ED10953/TM6c</i>          | Treated as <i>Df(3R)ED10953/+</i>         |
| <i>Df(3R)ED10946/TM6C</i>          | <i>Df(2R)ED1770/SM6a</i>           | Treated as <i>Df(2R)ED1770/+</i>          |
| <i>Df(3R)ED10946/TM6C</i>          | <i>Df(2R)ED1612/SM6a</i>           | Treated as <i>Df(2R)ED1612/+</i>          |
| <i>Df(3R)ED10946/TM6C</i>          | <i>Df(2L)ED3/SM6a</i>              | Treated as <i>Df(2L)ED3/+</i>             |
| <i>Df(3R)ED10953/TM6c</i>          | <i>Df(2L)ED4559/SM6a</i>           |                                           |
| <i>Df(3R)ED10953/TM6c</i>          | <i>Df(2L)ED748/SM6a</i>            | Treated as <i>Df(3R)ED10953/+</i>         |
| <i>Df(3R)ED10953/TM6c</i>          | <i>Df(2R)ED1770/SM6a</i>           | Lethal combination                        |
| <i>Df(3R)ED10953/TM6c</i>          | <i>Df(2R)ED1612/SM6a</i>           |                                           |
| <i>Df(3R)ED10953/TM6c</i>          | <i>Df(2L)ED3/SM6a</i>              |                                           |
| <i>Df(2L)ED4559/SM6a</i>           | <i>Df(2L)ED748/SM6a</i>            | Treated as <i>Df(2L)ED4559/+</i>          |
| <i>Df(2L)ED4559/SM6a</i>           | <i>Df(2R)ED1770/SM6a</i>           |                                           |
| <i>Df(2L)ED4559/SM6a</i>           | <i>Df(2R)ED1612/SM6a</i>           |                                           |
| <i>Df(2L)ED4559/SM6a</i>           | <i>Df(2L)ED3/SM6a</i>              |                                           |
| <i>Df(2L)ED748/SM6a</i>            | <i>Df(2R)ED1770/SM6a</i>           | Treated as <i>Df(2R)ED1770/+</i>          |
| <i>Df(2L)ED748/SM6a</i>            | <i>Df(2R)ED1612/SM6a</i>           | Treated as <i>Df(2R)ED1612/+</i>          |
| <i>Df(2L)ED748/SM6a</i>            | <i>Df(2L)ED3/SM6a</i>              | Treated as <i>Df(2L)ED3/+</i>             |
| <i>Df(2R)ED1770/SM6a</i>           | <i>Df(2R)ED1612/SM6a</i>           |                                           |
| <i>Df(2R)ED1770/SM6a</i>           | <i>Df(2L)ED3/SM6a</i>              |                                           |
| <i>Df(2R)ED1612/SM6a</i>           | <i>Df(2L)ED3/SM6a</i>              |                                           |

\*: Not included in the analysis

Supplementary Table 2

|                                                | <i>Df</i> -Wt | 3' UTR length | CDS length | Gene Length (bp) | Intron length | 5' UTR length | Median WT expression | FlyAtlas expression pattern (12 tissue types) | Normalized 3'UTR length | Standard deviation FlyAtlas expression pattern | Normalized CDS length | Distance to expressed 5' neighbouring gene | Normalized Intron length | Normalized 5'UTR length | Buffering level of neighbouring gene | Standard deviation 6 WT | Distance to 5' neighbouring gene |
|------------------------------------------------|---------------|---------------|------------|------------------|---------------|---------------|----------------------|-----------------------------------------------|-------------------------|------------------------------------------------|-----------------------|--------------------------------------------|--------------------------|-------------------------|--------------------------------------|-------------------------|----------------------------------|
| <i>Df</i> -Wt                                  | 1,000         | 0,308         | 0,259      | 0,249            | 0,176         | 0,132         | -0,127               | -0,121                                        | 0,111                   | 0,108                                          | -0,100                | 0,098                                      | 0,097                    | -0,094                  | 0,068                                | 0,025                   | 0,023                            |
| 3' UTR length                                  | 0,308         | 1,000         | 0,234      | 0,512            | 0,476         | 0,530         | 0,056                | -0,061                                        | 0,618                   | 0,172                                          | -0,614                | 0,089                                      | 0,381                    | 0,060                   | 0,105                                | 0,101                   | -0,059                           |
| CDS length                                     | 0,259         | 0,234         | 1,000      | 0,661            | 0,420         | 0,303         | -0,139               | -0,043                                        | -0,329                  | 0,067                                          | 0,037                 | 0,108                                      | 0,203                    | -0,276                  | 0,028                                | 0,085                   | 0,040                            |
| Gene Length (bp)                               | 0,249         | 0,512         | 0,661      | 1,000            | 0,803         | 0,582         | 0,014                | -0,112                                        | -0,202                  | 0,196                                          | -0,539                | 0,083                                      | 0,655                    | -0,191                  | 0,104                                | 0,155                   | -0,022                           |
| Intron length                                  | 0,176         | 0,476         | 0,420      | 0,803            | 1,000         | 0,593         | 0,066                | -0,160                                        | -0,237                  | 0,251                                          | -0,792                | 0,143                                      | 0,955                    | -0,159                  | 0,088                                | 0,146                   | 0,043                            |
| 5' UTR length                                  | 0,132         | 0,530         | 0,303      | 0,582            | 0,593         | 1,000         | 0,128                | 0,076                                         | 0,063                   | 0,099                                          | -0,605                | 0,017                                      | 0,528                    | 0,549                   | 0,080                                | 0,017                   | -0,043                           |
| Median WT expression                           | -0,127        | 0,056         | -0,139     | 0,014            | 0,066         | 0,128         | 1,000                | 0,425                                         | 0,105                   | 0,007                                          | -0,138                | -0,053                                     | 0,088                    | 0,205                   | 0,092                                | -0,113                  | -0,009                           |
| FlyAtlas expression pattern                    | -0,121        | -0,061        | -0,043     | -0,112           | -0,160        | 0,076         | 0,425                | 1,000                                         | 0,077                   | -0,671                                         | 0,117                 | -0,232                                     | -0,188                   | 0,304                   | -0,039                               | -0,474                  | -0,154                           |
| Normalized 3'UTR length                        | 0,111         | 0,618         | -0,329     | -0,202           | -0,237        | 0,063         | 0,105                | 0,077                                         | 1,000                   | 0,014                                          | -0,154                | -0,040                                     | -0,226                   | 0,349                   | 0,004                                | -0,039                  | -0,058                           |
| Standard deviation FlyAtlas expression pattern | 0,108         | 0,172         | 0,067      | 0,196            | 0,251         | 0,099         | 0,007                | -0,671                                        | 0,014                   | 1,000                                          | -0,209                | 0,273                                      | 0,266                    | -0,135                  | 0,098                                | 0,532                   | 0,187                            |
| Normalized CDS length                          | -0,100        | -0,614        | 0,037      | -0,539           | -0,792        | -0,605        | -0,138               | 0,117                                         | -0,154                  | -0,209                                         | 1,000                 | -0,097                                     | -0,844                   | -0,096                  | -0,130                               | -0,102                  | -0,008                           |
| Distance to expressed 5' neighbouring gene     | 0,098         | 0,089         | 0,108      | 0,083            | 0,143         | 0,017         | -0,053               | -0,232                                        | -0,040                  | 0,273                                          | -0,097                | 1,000                                      | 0,134                    | -0,114                  | 0,041                                | 0,202                   | 0,708                            |
| Normalized Intron length                       | 0,097         | 0,381         | 0,203      | 0,655            | 0,955         | 0,528         | 0,088                | -0,188                                        | -0,226                  | 0,266                                          | -0,844                | 0,134                                      | 1,000                    | -0,114                  | 0,089                                | 0,131                   | 0,051                            |
| Normalized 5'UTR length                        | -0,094        | 0,060         | -0,276     | -0,191           | -0,159        | 0,549         | 0,205                | 0,304                                         | 0,349                   | -0,135                                         | -0,096                | -0,114                                     | -0,114                   | 1,000                   | -0,035                               | -0,180                  | -0,045                           |
| Buffering level of neighbouring gene           | 0,068         | 0,105         | 0,028      | 0,104            | 0,088         | 0,080         | 0,092                | -0,039                                        | 0,004                   | 0,098                                          | -0,130                | 0,041                                      | 0,089                    | -0,035                  | 1,000                                | 0,096                   | -0,016                           |
| Standard deviation 6 WT replicates             | 0,025         | 0,101         | 0,085      | 0,155            | 0,146         | 0,017         | -0,113               | -0,474                                        | -0,039                  | 0,532                                          | -0,102                | 0,202                                      | 0,131                    | -0,180                  | 0,096                                | 1,000                   | 0,166                            |
| Distance to 5' neighbouring gene               | 0,023         | -0,059        | 0,040      | -0,022           | 0,043         | -0,043        | -0,009               | -0,154                                        | -0,058                  | 0,187                                          | -0,008                | 0,708                                      | 0,051                    | -0,045                  | -0,016                               | 0,166                   | 1,000                            |

Supplementary Figure S1

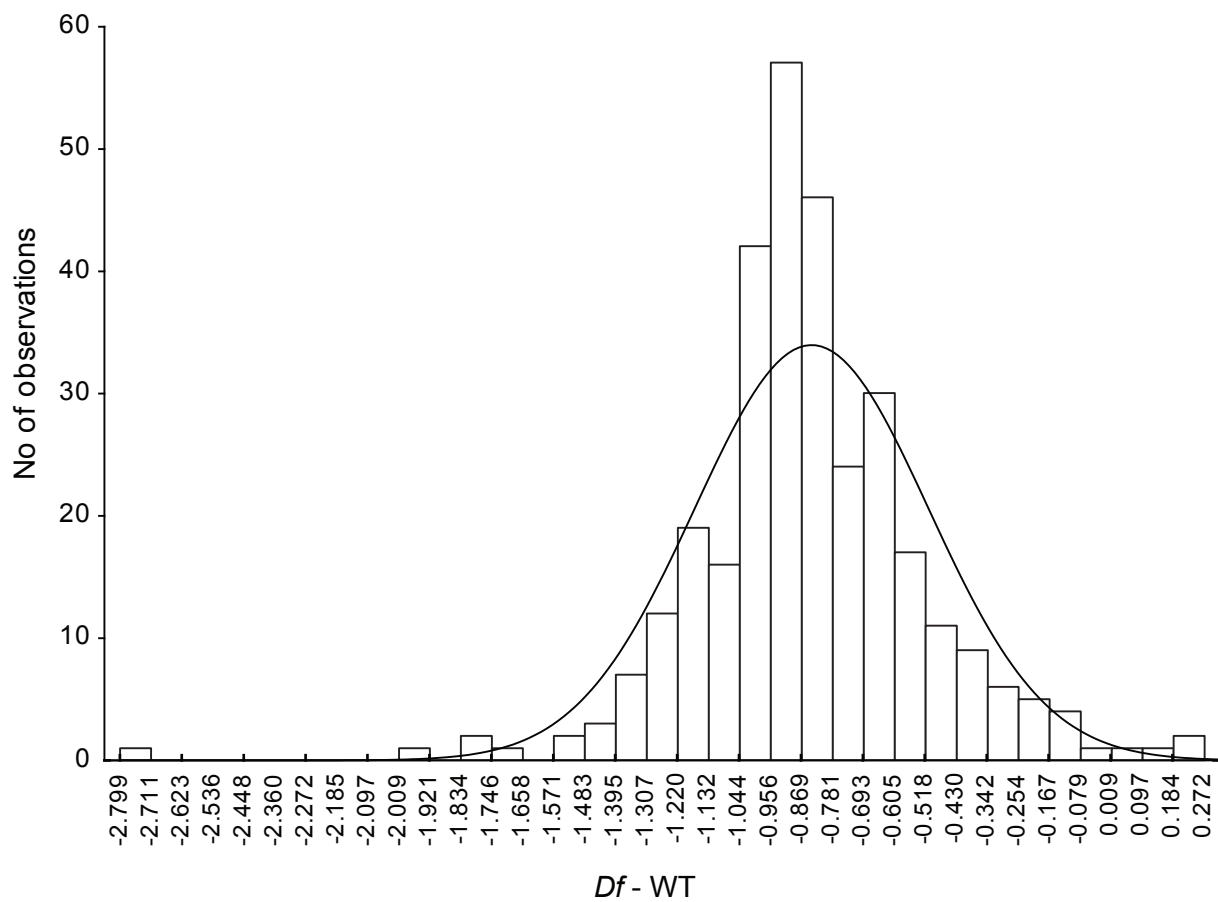

Supplementary Table S3

| Probsat ID   | Number datasets with Df-wt >1.0 | Fold Change (mean of 38 datasets) | SD    | Gene Symbol | chromosome | Proteolysis | Serine-type        | Serine-type            | endopeptidase activity |
|--------------|---------------------------------|-----------------------------------|-------|-------------|------------|-------------|--------------------|------------------------|------------------------|
|              |                                 |                                   |       |             |            |             | peptidase activity | endopeptidase activity |                        |
| 1624543_s_at | 32                              | 1,947                             | 1,042 | ---         | chr2RHet   |             |                    |                        |                        |
| 1640407_at   | 27                              | 1,245                             | 0,567 | CG9897      | chr2R      | x           | x                  | x                      | x                      |
| 1628963_at   | 25                              | 1,240                             | 0,576 | CG4716      | chr2R      |             |                    |                        |                        |
| 1623884_at   | 23                              | 1,221                             | 0,821 | CG16775     | chr3L      |             |                    |                        |                        |
| 1633631_at   | 27                              | 1,176                             | 0,516 | CG9682      | chr3R      |             |                    |                        |                        |
| 1633214_at   | 20                              | 1,151                             | 0,844 | CG4835      | chr3L      |             |                    |                        |                        |
| 1629050_at   | 21                              | 1,135                             | 0,576 | CG10477     | chr3L      | x           | x                  | x                      | x                      |
| 1624285_at   | 21                              | 1,087                             | 0,598 | CG3088      | chr3L      | x           | x                  | x                      | x                      |
| 1629098_at   | 23                              | 1,085                             | 0,588 | CG7631      | chr2L      | x           |                    |                        | x                      |
| 1634158_at   | 24                              | 1,076                             | 0,569 | Npc2f       | chr3R      |             |                    |                        |                        |
| 1639729_s_at | 20                              | 1,071                             | 0,989 | ---         | chr2L      |             |                    |                        |                        |
| 1625141_at   | 17                              | 0,981                             | 1,102 | CG14715     | chr3R      |             |                    |                        |                        |
| 1635446_at   | 19                              | 0,980                             | 0,502 | CG15043     | chrX       |             |                    |                        |                        |
| 1624137_at   | 21                              | 0,979                             | 0,842 | CG11911     | chr2L      | x           | x                  | x                      | x                      |
| 1640884_at   | 20                              | 0,979                             | 0,504 | CG15784     | chrX       |             |                    |                        |                        |
| 1627895_at   | 20                              | 0,963                             | 0,367 | CG18404     | chr3R      |             |                    |                        |                        |
| 1630822_at   | 21                              | 0,934                             | 0,915 | CG13078     | chr2L      |             |                    |                        |                        |
| 1632964_at   | 20                              | 0,930                             | 0,673 | pirk        | chr2R      |             |                    |                        |                        |
| 1627144_at   | 18                              | 0,905                             | 0,264 | CG10560     | chr3R      |             |                    |                        |                        |
| 1625538_at   | 17                              | 0,895                             | 1,201 | Jon66Ci     | chr3L      | x           | x                  | x                      | x                      |
| 1633002_at   | 16                              | 0,893                             | 0,364 | CG2196      | chr3R      |             |                    |                        |                        |
| 1635086_at   | 18                              | 0,891                             | 0,459 | CG4666      | chrX       |             |                    |                        |                        |
| 1630667_at   | 11                              | 0,874                             | 0,265 | CG34043     | chr2L      | x           | x                  | x                      | x                      |
| 1625058_at   | 19                              | 0,874                             | 0,446 | yellow-d    | chr2R      |             |                    |                        |                        |
| 1633675_at   | 18                              | 0,866                             | 0,567 | CG30008     | chr2R      |             |                    |                        |                        |
| 1624805_at   | 14                              | 0,851                             | 0,835 | CG31041     | chr3R      |             |                    |                        |                        |
| 1639641_at   | 16                              | 0,851                             | 0,743 | CG8560      | chr3L      | x           |                    |                        |                        |
| 1627489_a_at | 15                              | 0,851                             | 0,401 | CG10433     | chr2R      |             |                    |                        |                        |
| 1632453_at   | 18                              | 0,843                             | 0,569 | eloF        | chr3R      |             |                    |                        |                        |
| 1629046_a_at | 19                              | 0,838                             | 0,545 | CG4716      | chr2R      |             |                    |                        |                        |
| 1639268_at   | 15                              | 0,834                             | 0,567 | CG13324     | chr2R      |             |                    |                        |                        |
| 1633425_at   | 12                              | 0,828                             | 0,347 | Smtv        | chr3R      |             |                    |                        |                        |
| 1636183_at   | 16                              | 0,826                             | 0,951 | CG32198     | chr3L      |             |                    |                        |                        |
| 1634871_s_at | 12                              | 0,826                             | 0,361 | ---         | chr3L      |             |                    |                        |                        |
| 1641234_at   | 15                              | 0,824                             | 0,554 | CG16997     | chr2L      | x           | x                  | x                      | x                      |
| 1638182_at   | 12                              | 0,822                             | 0,463 | CG5999      | chr3R      |             |                    |                        |                        |
| 1636885_at   | 17                              | 0,817                             | 0,580 | CG17560     | chr3R      |             |                    |                        |                        |
| 1636798_at   | 16                              | 0,816                             | 0,545 | CG13482     | chr3L      |             |                    |                        |                        |
| 1635498_at   | 12                              | 0,812                             | 0,405 | CG9259      | chr2L      |             |                    |                        |                        |
| 1634240_at   | 17                              | 0,808                             | 0,509 | CG5107      | chr3R      |             |                    |                        |                        |
| 1632072_at   | 8                               | 0,803                             | 0,229 | CG34134     | chr2L      |             |                    |                        |                        |
| 1636420_at   | 14                              | 0,803                             | 0,472 | CG16826     | chr2L      |             |                    |                        |                        |
| 1633642_at   | 12                              | 0,799                             | 0,480 | ---         | chrX       |             |                    |                        |                        |
| 1627463_at   | 12                              | 0,796                             | 0,575 | Damm        | chr2R      | x           |                    |                        | x                      |
| 1635267_s_at | 17                              | 0,791                             | 0,428 | Tsp66E      | chr3L      |             |                    |                        |                        |
| 1631224_at   | 13                              | 0,786                             | 0,396 | Est-6       | chr3L      |             |                    |                        |                        |
| 1636470_at   | 13                              | 0,784                             | 0,483 | CG34026     | chrX       |             |                    |                        |                        |
| 1629969_at   | 10                              | 0,781                             | 0,519 | CG11426     | chr3L      |             |                    |                        |                        |
| 1641711_at   | 10                              | 0,768                             | 0,323 | CG13360     | chrX       |             |                    |                        |                        |
| 1636293_at   | 11                              | 0,743                             | 0,817 | CG2217      | chr3R      |             |                    |                        |                        |
| 1632874_at   | 5                               | 0,728                             | 0,280 | CG6602      | chr3L      |             |                    |                        |                        |
| 1623363_at   | 12                              | 0,726                             | 0,544 | CG6432      | chr3R      |             |                    |                        |                        |
| 1638501_at   | 7                               | 0,726                             | 0,319 | Muc11A      | chrX       |             |                    |                        |                        |
| 1626832_at   | 11                              | 0,723                             | 0,394 | CG31343     | chr3R      | x           |                    |                        |                        |
| 1630363_at   | 14                              | 0,723                             | 0,538 | CG10469     | chr3L      | x           | x                  | x                      | x                      |
| 1631446_at   | 9                               | 0,718                             | 0,466 | Chit9       | chr2R      |             |                    |                        |                        |
| 1635846_a_at | 15                              | 0,711                             | 0,588 | orb         | chr3R      |             |                    |                        |                        |
| 1625374_at   | 8                               | 0,705                             | 0,470 | CG9466      | chr2L      |             |                    |                        |                        |
| 1630419_a_at | 12                              | 0,694                             | 0,684 | CG7300      | chr2L      |             |                    |                        |                        |
| 1640221_at   | 9                               | 0,690                             | 0,381 | CG10479     | chr3L      |             |                    |                        |                        |
| 1631529_at   | 8                               | 0,687                             | 0,361 | Ser12       | chr2L      | x           | x                  | x                      | x                      |
| 1627259_a_at | 13                              | 0,685                             | 0,482 | ovo         | chrX       |             |                    |                        |                        |
| 1632584_at   | 9                               | 0,676                             | 0,607 | CG3344      | chr3L      | x           | x                  |                        |                        |
| 1630669_at   | 14                              | 0,673                             | 0,838 | CG7299      | chr2L      |             |                    |                        |                        |
| 1639953_at   | 16                              | 0,668                             | 0,811 | osk         | chr3R      |             |                    |                        |                        |
| 1633344_at   | 9                               | 0,658                             | 0,338 | Cpr92F      | chr3R      |             |                    |                        |                        |
| 1640249_at   | 7                               | 0,656                             | 0,437 | CG33173     | chrX       |             |                    |                        |                        |
| 1625648_at   | 12                              | 0,656                             | 0,637 | CG3868      | chr3L      |             |                    |                        |                        |
| 1635525_at   | 9                               | 0,654                             | 0,439 | CG9672      | chrX       | x           | x                  | x                      | x                      |
| 1633613_at   | 10                              | 0,653                             | 0,532 | CG2765      | chr2R      |             |                    |                        |                        |
| 1624596_at   | 8                               | 0,652                             | 0,436 | CG31463     | chr3R      |             |                    |                        |                        |
| 1640355_at   | 11                              | 0,648                             | 0,593 | CG5246      | chr3R      | x           | x                  | x                      | x                      |
| 1638661_at   | 13                              | 0,644                             | 0,661 | yip7        | chr3L      | x           | x                  | x                      | x                      |
| 1638774_at   | 7                               | 0,642                             | 0,405 | CG16904     | chr3R      |             |                    |                        |                        |
| 1625400_at   | 9                               | 0,635                             | 0,506 | Cpr47Ea     | chr2R      |             |                    |                        |                        |
| 1624069_at   | 3                               | 0,633                             | 0,347 | CG7296      | chr2L      |             |                    |                        |                        |
| 1631472_at   | 10                              | 0,632                             | 0,563 | Chit4       | chr2R      |             |                    |                        |                        |
| 1629446_at   | 7                               | 0,629                             | 0,393 | CG1136      | chr3L      |             |                    |                        |                        |
| 1629007_at   | 6                               | 0,629                             | 0,359 | CG8952      | chrX       | x           | x                  | x                      | x                      |
| 1639394_at   | 8                               | 0,627                             | 0,413 | m1          | chr3R      |             |                    |                        |                        |
| 1624558_at   | 16                              | 0,624                             | 1,214 | dro3        | chr3L      |             |                    |                        |                        |
| 1627122_at   | 11                              | 0,619                             | 0,462 | CG32767     | chrX       |             |                    |                        |                        |
| 1634449_at   | 8                               | 0,616                             | 0,434 | CG9459      | chr3R      |             |                    |                        |                        |
| 1625257_s_at | 8                               | 0,614                             | 0,402 | CG31523     | chr3R      |             |                    |                        |                        |
| 1638903_at   | 4                               | 0,611                             | 0,373 | CG5724      | chr3R      |             |                    |                        |                        |
| 1625436_at   | 12                              | 0,606                             | 0,742 | Uro         | chr2L      |             |                    |                        |                        |
| 1635815_at   | 3                               | 0,606                             | 0,353 | zetaTry     | chr2R      | x           | x                  | x                      | x                      |
| 1626524_at   | 6                               | 0,606                             | 0,442 | CG16996     | chr2L      | x           | x                  | x                      | x                      |
| 1626309_at   | 6                               | 0,604                             | 0,409 | Muc68D      | chr3L      |             |                    |                        |                        |
| 1631369_at   | 9                               | 0,603                             | 0,573 | CG7567      | chr3R      |             |                    |                        |                        |
| 1623165_at   | 9                               | 0,602                             | 0,513 | thetaTry    | chr2R      | x           | x                  | x                      | x                      |
| 1625266_at   | 6                               | 0,599                             | 0,408 | Ag5r        | chrX       |             |                    |                        |                        |
| 1626414_at   | 2                               | 0,593                             | 0,233 | Jheh1       | chr2R      |             |                    |                        |                        |
| 1633009_a_at | 14                              | 0,591                             | 1,029 | CG6640      | chr3L      |             |                    |                        |                        |
| 1625948_at   | 12                              | 0,590                             | 0,576 | CG17633     | chr2L      | x           |                    |                        |                        |
| 1625218_at   | 9                               | 0,584                             | 0,457 | CG11399     | chr3L      |             |                    |                        |                        |
| 1626044_at   | 6                               | 0,584                             | 0,401 | ---         | chr3L      |             |                    |                        |                        |
| 1635968_at   | 3                               | 0,583                             | 0,343 | CG3604      | chr2L      |             |                    |                        |                        |
| 1625195_s_at | 12                              | 0,579                             | 1,135 | shn         | chr2R      |             |                    |                        |                        |
| 1636488_at   | 0                               | 0,578                             | 0,207 | CG4468      | chr3R      |             |                    |                        |                        |

## Supplementary Table S4

|                | Sense                         | Antisense                     |
|----------------|-------------------------------|-------------------------------|
| <i>CG9897</i>  | 5'-AGTGCCGTGCAATTGGACAG-3'    | 5'-AACCTGCGAGCTACTCAACACC-3'  |
| <i>CG7631</i>  | 5'-GGAATGGACAGCTATCCGAG-3'    | 5'-AGGCACAAATCGAATACAAGAC-3'  |
| <i>CG11911</i> | 5'-TTGCTCTGTTGCAGGGAAG-3'     | 5'-ACCACCCAAATTTTGA ACTACG-3' |
| <i>CG3088</i>  | 5'-CACTGTCACCGTAAACTGG-3'     | 5'-TGGACAGAGCAACATCTGG-3'     |
| <i>CG10477</i> | 5'-GGACCCATAGTAGATGGTCAC-3'   | 5'-AACCAGTTTCCCTACCAGG-3'     |
| <i>CG8560</i>  | 5'-GTATACTTCGTTCCGGTCGC-3'    | 5'-TACCTGACCCTCCACTCCTATG-3'  |
| <i>CG5384</i>  | 5'-CCAAAAA ACTGGTCGATAAACG-3' | 5'-AAATGGCACATACAGGCAG-3'     |
| <i>Rpl32</i>   | 5'-CGATGTTGGGCATCAGATAC-3'    | 5'-CCCAAGATCGTGAAGAAGC-3'     |
